# Supplementary material for: In Vitro and In Vivo Antiviral Activity of Nylidrin by Targeting the Hemagglutinin 2-Mediated Membrane Fusion of Influenza A Virus
Source: Viruses. 2020 May 25;12(5):581. doi: 10.3390/v12050581 (PMC7290441; doi:10.3390/v12050581)
Supplement: Supplementary file 1 [file viruses-12-00581-s001.pdf]

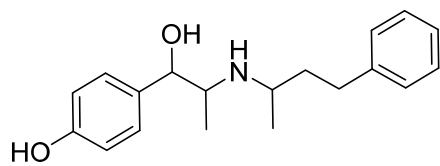

Nylidrin

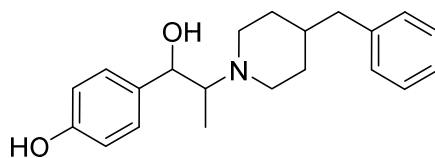

Ifenprodil

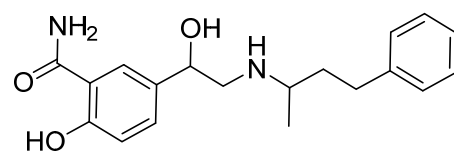

Labetalol

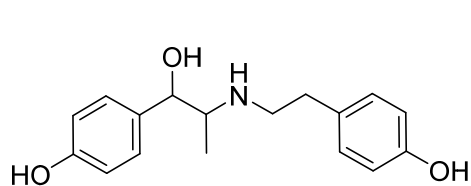

Ritodrine

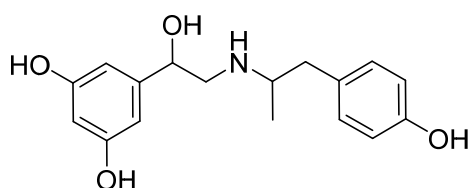

Fenoterol

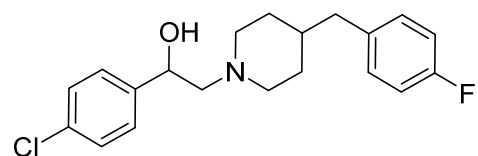

Eliprodil

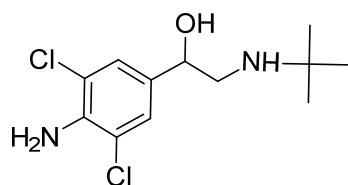

Clenbuterol

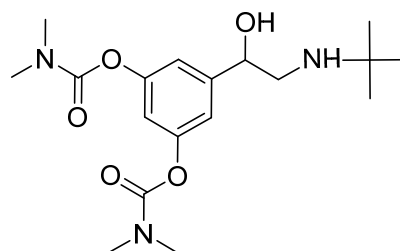

Bambuterol

**Supplementary Figure S1.** Chemical structure of nylidrin and its analogues.

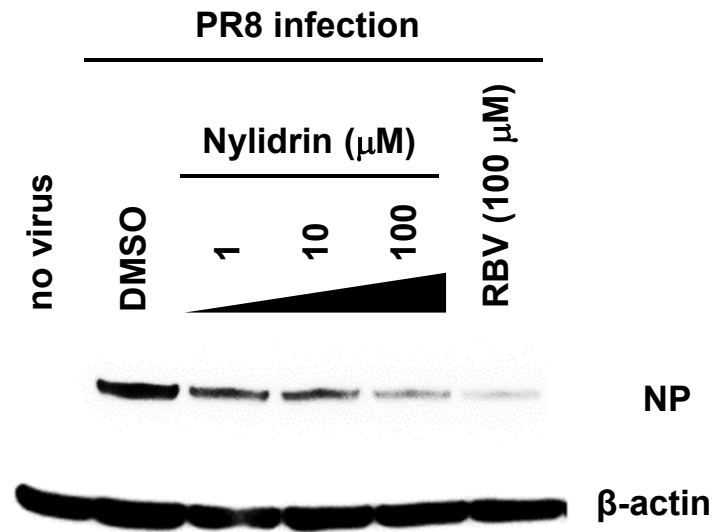

**Supplementary Figure S2.** Reduction of a viral protein, NP, by nylidrin in human lung epithelial cells. A549 cells were mock-infected (No virus) or infected with PR8 virus at an MOI of 0.01 in the presence of DMSO (0.2%, a delivery vehicle), nylidrin (1, 10 or 100  $\mu$ M) or RBV (100  $\mu$ M) for 24 h at 35°C. NP and  $\beta$ -actin, as a loading control, are marked on the right side of the gels.

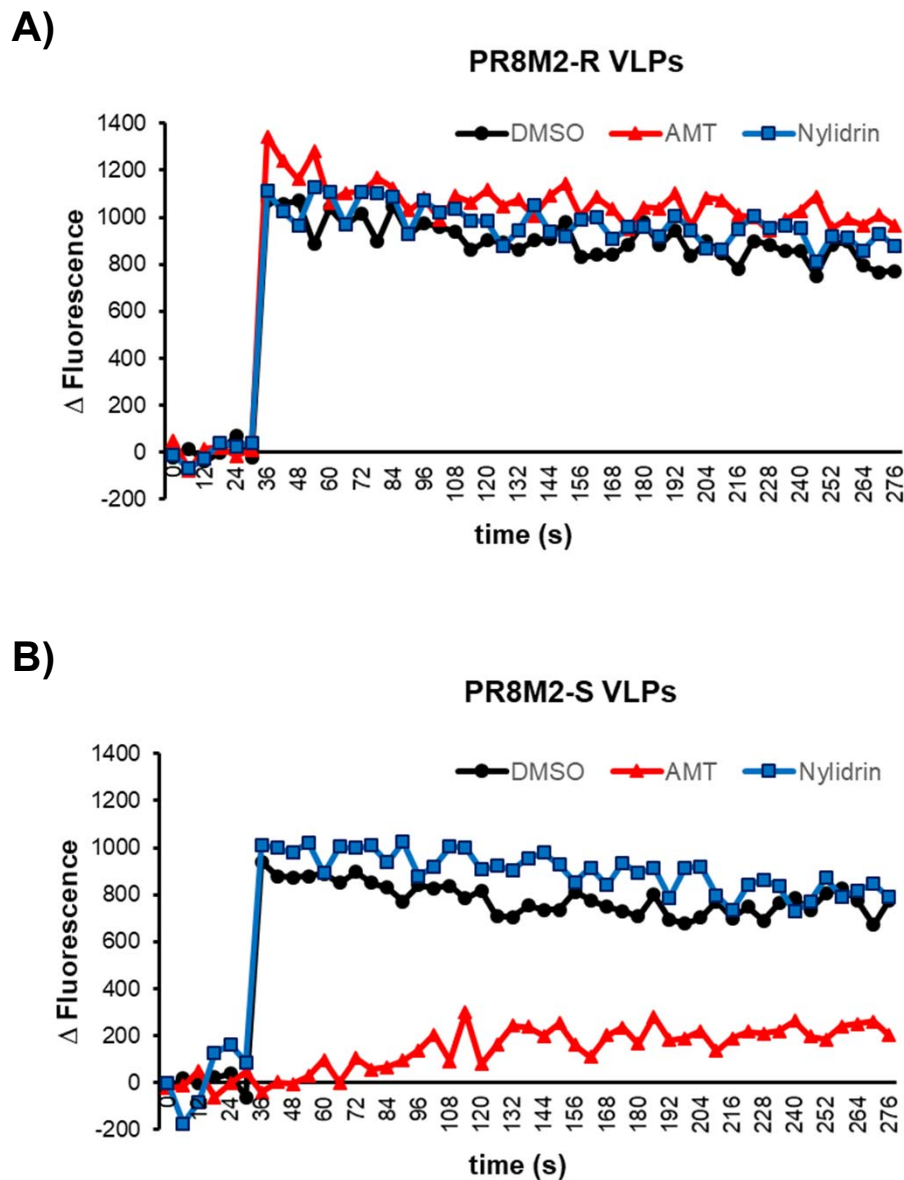

**Supplementary Figure S3.** No effect of nyldrin on the proton channel activity of influenza viral M2. Murine leukemia virus (MLV) Gag-derived VLPs with PR8M2-R (A) or PR8M2-S (B) were suspended in 10 mM HEPES (pH 7.0) and 150 mM NaCl supplemented with 1% FMP-Blue dye (Molecular Deivces, Sunnyvale, CA). They were incubated with 100  $\mu$ M salinomycin or AMT at room temperature for 1 h. Channel activity was measured at 6 s intervals for 5 min after addition of 150 mM 2-(N-morpholino)ethanesulfonic acid (pH 4.5). DMSO-treated VLPs were used as a control. Proton channel activity was determined by measuring fluorescence at 6 s intervals for 5 min. Values represent the average of three independent experiments.

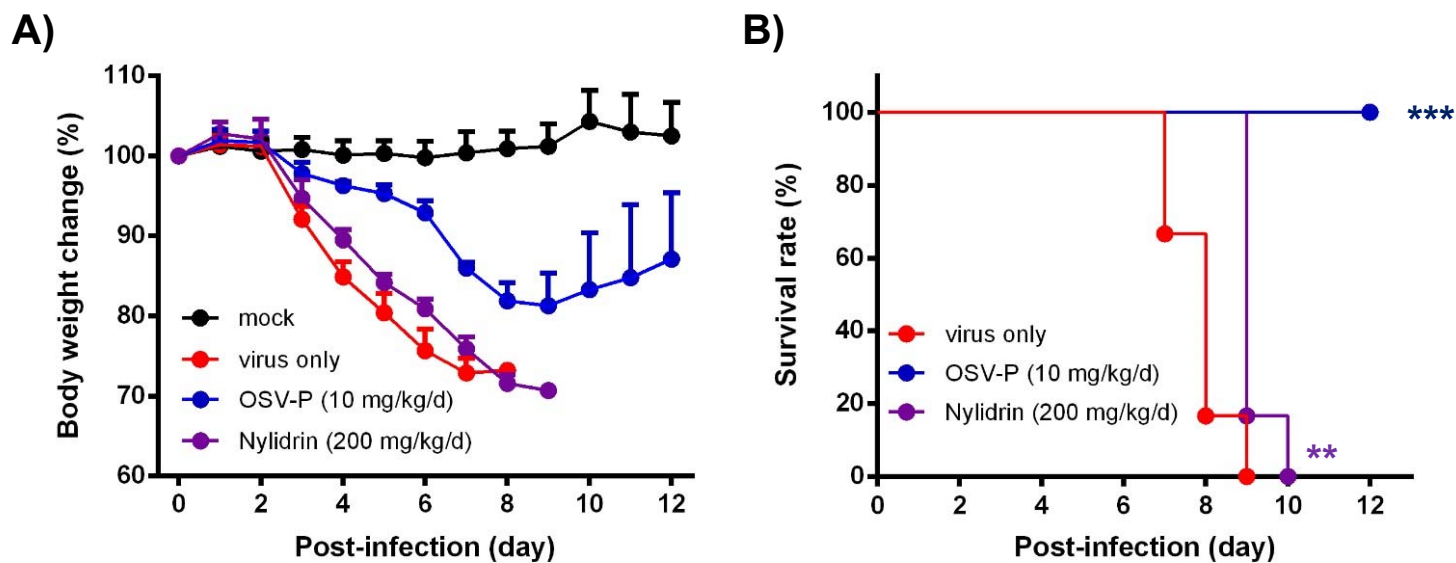

**Supplementary Figure S4.** Increase of mean survival time of maPR8-infected mice by oral administration of nylidrin. BALB/c mice (6–7 weeks old) infected with maPR8 (5 MLD<sub>50</sub>) were orally treated with OSV-P (10 mg/kg/day) or nylidrin (200 mg/kg/day) twice a day beginning 4 h before virus infection at 8-h intervals for 6 days or 13 days post-infection, respectively. Body weight (A) and mortality (B) were measured every day. Statistical analysis was performed using the two-tailed Student's *t*-test relative to the virus-only group. *n* = 6; \*\*, *P* < 0.01; \*\*\*, *P* < 0.001.
